# Supplementary material
Source: publisher figshare collection journal article supplement (https://gsapubs.figshare.com/ndownloader/files/39510958)
Supplement: Supplementary file 1 [file 39510958]

## Sheet: Supplementary table S4
		Position relative to K-Pg (base Ir-Clay = 0)
Site	Laboratory ID	Top	Bottom	Midpoint	Midpoint relative to K-Pg (ka)	MBT'5Me average	MAAT average
Rock Creek West	RCW1	80.5	76.5	78.5	38.8917	0.804677	18.9381
Rock Creek West	RCW2a	76.5	74.5	75.5	37.4054	0.807781	19.1
Rock Creek West	RCW2b	74.5	72.5	73.5	36.4145	0.840451	20.8047
Rock Creek West	RCW3	72.5	70	71.25	35.2998	0.779671	17.6332
Rock Creek West	RCW4	70	68	69	34.1851	0.762467	16.7355
Rock Creek West	RCW5	68	65	66.5	32.9465	0.771303	17.1966
Rock Creek West	RCW6	65	63	64	31.7079	0.792686	18.3123
Rock Creek West	RCW7	63	60.5	61.75	30.5932	0.773147	17.2928
Rock Creek West	RCW8a	60.5	59.5	60	29.75	0.794175	18.39
Rock Creek West	RCW8b	59.5	56.5	58	28.95	0.791747	18.2633
Rock Creek West	RCW9	56.5	53	54.75	27.65	0.804306	18.9187
Rock Creek West	RCW10	53	50	51.5	26.35	0.786081	17.9677
Rock Creek West	RCW11	50	47.5	48.75	25.0326	0.902085	24.0208
Rock Creek West	RCW12a	47.5	46	46.75	23.7978	0.882522	23
Rock Creek West	RCW12b	46	42.5	44.25	22.2543	0.909215	24.3929
Rock Creek West	RCW13	42.5	41.5	42	21.0667	0.857194	21.6784
Rock Creek West	RCW14	41.5	39	40.25	20.0818	0.842574	20.9155
Rock Creek West	RCW15a	39	37.5	38.25	18.8333	0.908347	24.3476
Rock Creek West	RCW15b	37.5	35.5	36.5	17.7409	0.854072	21.5155
Rock Creek West	RCW16	35.5	33	34.25	16.3364	0.934215	25.6973
Rock Creek West	RCW17	33	31	32	14.9167	0.886319	23.1981
Rock Creek West	RCW18a	31	28.5	29.75	13.4667	0.938575	25.9248
Rock Creek West	RCW18b	28.5	26	27.25	12.0692	0.881328	22.9377
Rock Creek West	RCW19	26	24.5	25.25	11.2077	0.959743	27.0294
Rock Creek West	RCW20	24.5	21.5	23	10.2385	0.936747	25.8294
Rock Creek West	RCW21	21.5	18.5	20	8.94615	0.929897	25.472
Rock Creek West	RCW22	18.5	16	17.25	7.7375	0.925889	25.2629
Rock Creek West	RCW23	16	12.5	14.25	6.3875	0.905044	24.1752
Rock Creek West	RCW24	12.5	10	11.25	5.03718	0.932512	25.6085
Rock Creek West	RCW25	10	7	8.5	3.79615	0.928268	25.387
Rock Creek West	RCW26	7	5	6	2.66795	0.952408	26.6467
Rock Creek West	RCW27	5	2.5	3.75	1.65256	0.976058	27.8807
Rock Creek West	RCW28a	2.5	1.5	2	0.862821	0.946424	26.3344
Rock Creek West	RCW28b	1.5	-0.5	0.5	0.25
Rock Creek West	RCW29	-0.5	-2	-1.25	-0.45	0.96228	27.1618
Rock Creek West	RCW30	-2	-6	-4	-1.55	0.957185	26.8959
Wood Mountain Creek	8_07_1	61	59.5	60.25	60.25	0.71748	14.3881
Wood Mountain Creek	8_07_2	59.5	58	58.75	58.75
Wood Mountain Creek	8_08_1	58	56.5	57.25	57.25	0.876124	22.6662
Wood Mountain Creek	8_08_2	56.5	55	55.75	55.75	0.891524	23.4697
Wood Mountain Creek	8_09_1	55	53.5	54.25	54.25	0.875181	22.6169
Wood Mountain Creek	8_09_2	53.5	52	52.75	52.75	0.817341	19.5988
Wood Mountain Creek	8_10_1	52	50.5	51.25	51.25	0.815243	19.4894
Wood Mountain Creek	8_10_2	50.5	49	49.75	49.75	0.826984	20.102
Wood Mountain Creek	8_11_1	49	47.5	48.25	48.25	0.89414	23.6062
Wood Mountain Creek	8_11_2	47.5	46.5	47	47	0.886584	23.2119
Wood Mountain Creek	8_11_3	46.5	44.5	45.5	45.5	0.906389	24.2454
Wood Mountain Creek	8_12_1	44.5	43.5	44	44	0.83893	20.7254
Wood Mountain Creek	8_12_2	43.5	41.5	42.5	42.5	0.832739	20.4023
Wood Mountain Creek	8_12_3	41.5	40.5	41	41	0.861509	21.9035
Wood Mountain Creek	8_13_1	40.5	39.5	40	40	0.86237	21.9485
Wood Mountain Creek	8_13_2	39.5	38.5	39	39	0.838983	20.7282
Wood Mountain Creek	8_14_1	38.5	37	37.75	37.75	0.88025	22.8815
Wood Mountain Creek	8_14_2	37	36	36.5	36.5	0.814164	19.4331
Wood Mountain Creek	8_14_3	36	35	35.5	35.5	0.880555	22.8974
Wood Mountain Creek	8_15_1	35	33.5	34.25	34.25	0.914935	24.6913
Wood Mountain Creek	8_15_2	33.5	32	32.75	32.75	0.919158	24.9117
Wood Mountain Creek	8_16_1	32	30.5	31.25	31.25	0.898121	23.814
Wood Mountain Creek	8_16_2	30.5	29	29.75	29.75	0.894062	23.6021
Wood Mountain Creek	8_17_1	29	27.5	28.25	28.25	0.869791	22.3357
Wood Mountain Creek	8_17_2	27.5	26	26.75	26.75	0.854965	21.5621
Wood Mountain Creek	8_17_3	26	24	25	25	0.662748	11.5322
Wood Mountain Creek	8_18_1	24	22.5	23.25	23.25	0.890404	23.4113
Wood Mountain Creek	8_18_2	22.5	21	21.75	21.75	0.815911	19.5242
Wood Mountain Creek	8_18_3	21	19.5	20.25	20.25	0.852788	21.4485
Wood Mountain Creek	8_19_1	19.5	17.5	18.5	18.5	0.884014	23.0779
Wood Mountain Creek	8_19_2	17.5	15.5	16.5	16.5	0.897828	23.7987
Wood Mountain Creek	8_20_1	15.5	14.5	15	15	0.918958	24.9013
Wood Mountain Creek	8_20_2	14.5	13.5	14	14	0.915431	24.7172
Wood Mountain Creek	8_20_3	13.5	12	12.75	12.75
Wood Mountain Creek	8_20_4	12	11	11.5	11.5	0.881309	22.9367
Wood Mountain Creek	8_20_5	11	10	10.5	10.5	0.859406	21.7938
Wood Mountain Creek	8_20_6	10	9	9.5	9.5	1	29.13
Wood Mountain Creek	8_21_1	9	8	8.5	8.5	0.897543	23.7838
Wood Mountain Creek	8_21_2	8	7	7.5	7.5	0.69679	13.3085
Wood Mountain Creek	8_21_3	7	6	6.5	6.5	0.887016	23.2345
Wood Mountain Creek	8_21_4	6	5	5.5	5.5	0.89467	23.6339
Wood Mountain Creek	8_21_5	5	4	4.5	4.5	0.930813	25.5198
Wood Mountain Creek	8_22_1	4	3	3.5	3.5	0.954301	26.7454
Wood Mountain Creek	8_22_2	3	2	2.5	2.5	1	29.13
Wood Mountain Creek	8_22_3	2	1.5	1.75	1.75	0.820604	19.7691
Wood Mountain Creek	8_23_1	1.5	1	1.25	1.25	0.967013	27.4088
Wood Mountain Creek	8_23_2	1	0.5	0.75	0.75
Wood Mountain Creek	8_23_3	0.5	0	0.25	0.25
Wood Mountain Creek	8_25_1	0	-1	-0.5	-0.5
Wood Mountain Creek	8_25_2	-1	-2	-1.5	-1.5	0.949553	26.4977
Wood Mountain Creek	8_26_1	-2	-3.5	-2.75	-2.75	0.931772	25.5698
Wood Mountain Creek	8_26_2	-3.5	-5	-4.25	-4.25	0.857271	21.6824
Wood Mountain Creek	8_26_3	-5	-6.5	-5.75	-5.75	0.930204	25.4881
Wood Mountain Creek	8_26_4	-6.5	-8	-7.25	-7.25	0.822746	19.8809
Wood Mountain Creek	8_26_5	-8	-9.5	-8.75	-8.75	0.911744	24.5248
Wood Mountain Creek	8_27_1	-9.5	-11	-10.25	-10.25	0.523797	4.28171

## Sheet: G50588
O’Connor, L.K., et al., 2023, Steady decline in mean annual air temperatures in the first 30 k.y. after the Cretaceous-Paleogene boundary: Geology, https://doi.org/10.1130/G50588.1
